# Supplementary material for: Triple oral combination therapy with macitentan, riociguat, and selexipag for pulmonary arterial hypertension
Source: PubMed Central journal article supplement — Ther Adv Respir Dis. 2021 Feb 24;15:1753466621995048. doi: 10.1177/1753466621995048 (PMC7919213; doi:10.1177/1753466621995048), 2021-02-24
Supplement: sj-pdf-5-tar-10.1177_1753466621995048.pdf [file sj-pdf-5-tar-10.1177_1753466621995048.pdf]

## Supplemental Figure Legend

1  
2  
3  
4  
5  
6  
7  
8  
9  
10  
11  
12  
13  
14

### **Supplemental Figure 1. Study flow chart**

**(A)** Analysis of hemodynamic data, 6MWD, BNP concentration, and WHO-FC. Among 8 patients who did not undergo follow-up RHC, 5 patients were followed up only with echocardiography, 2 patients stopped taking one of the combination drugs because of an adverse event before follow-up RHC, and one patient underwent prostacyclin infusion before follow-up RHC. **(B)** Analysis of echocardiographic parameters. Among 6 patients who did not undergo follow-up echocardiography, 2 patients stopped taking one of the combination drugs because of an adverse event before follow-up RHC, 2 patients underwent prostacyclin infusion before follow-up RHC, and 2 patients had no echocardiographic data at the time of the first visit. BNP, B-type natriuretic peptide; RHC, right heart catheterization; WHO-FC, World Health Organization functional class; 6MWD, 6-minute walk distance.
