# Supplementary material for: Triple oral combination therapy with macitentan, riociguat, and selexipag for pulmonary arterial hypertension
Source: PubMed Central journal article supplement — Ther Adv Respir Dis. 2021 Feb 24;15:1753466621995048. doi: 10.1177/1753466621995048 (PMC7919213; doi:10.1177/1753466621995048), 2021-02-24
Supplement: sj-pdf-7-tar-10.1177_1753466621995048.pdf [file sj-pdf-7-tar-10.1177_1753466621995048.pdf]

## Supplemental Tables

**Supplemental Table 1. Patients' baseline characteristics**

| Case # | Sex | BSA<br>(m <sup>2</sup> ) | Age at<br>enrollment<br>(years) | Medications at<br>baseline                              | Etiology of PAH | Genetic test          | REVEAL 2.0<br>risk score <sup>1</sup> | Risk group* |
|--------|-----|--------------------------|---------------------------------|---------------------------------------------------------|-----------------|-----------------------|---------------------------------------|-------------|
| 1      | F   | 1.61                     | 55                              | None                                                    | CHD-PAH         | No mutations          | 6                                     | Low         |
| 2      | F   | 1.58                     | 46                              | Macitentan 10 mg<br>Tadalafil 40 mg<br>Beraprost 120 µg | CTD-PAH         | Not tested            | 6                                     | Low         |
| 3      | F   | 1.73                     | 34                              | Bosentan 250 mg<br>Tadalafil 40 mg<br>Beraprost 360 µg  | IPAH            | No mutations          | 3                                     | Low         |
| 4      | F   | 1.54                     | 42                              | Bosentan 250 mg<br>Beraprost 120 µg                     | IPAH            | No mutations          | 6                                     | Low         |
| 5      | F   | 1.39                     | 48                              | Tadalafil 20 mg<br>Beraprost 360 µg                     | CTD-PAH         | Not tested            | 10                                    | High        |
| 6      | M   | 1.58                     | 59                              | Beraprost 60 µg                                         | HPAH            | <i>BMPR2</i> mutation | 14                                    | High        |
| 7      | F   | 1.64                     | 54                              | None                                                    | IPAH            | No mutations          | 9                                     | High        |

|    |   |      |    |                                                         |         |                        |    |              |
|----|---|------|----|---------------------------------------------------------|---------|------------------------|----|--------------|
| 8  | M | 1.79 | 52 | Sildenafil 180 mg                                       | CTD-PAH | Not tested             | 6  | Low          |
| 9  | F | 1.62 | 39 | None                                                    | CHD-PAH | No mutations           | 7  | Intermediate |
| 10 | M | 1.41 | 71 | None                                                    | CTD-PAH | No mutations           | 8  | Intermediate |
| 11 | M | 1.97 | 21 | Macitentan 10 mg<br>Tadalafil 80 mg<br>Beraprost 360 µg | IPAH    | No mutations           | 1  | Low          |
| 12 | F | 1.43 | 37 | None                                                    | CTD-PAH | No mutations           | 10 | High         |
| 13 | F | 1.64 | 17 | None                                                    | HPAH    | <i>BMPR2</i> mutation  | 11 | High         |
| 14 | F | 1.65 | 22 | None                                                    | CTD-PAH | No mutations           | 12 | High         |
| 15 | M | 1.78 | 49 | None                                                    | IPAH    | No mutations           | 7  | Intermediate |
| 16 | M | 1.74 | 45 | Bosentan 250 mg<br>Tadalafil 20 mg<br>Beraprost 120 µg  | HPAH    | <i>BMPR2</i> mutation  | 15 | High         |
| 17 | F | 1.30 | 19 | None                                                    | IPAH    | <i>RNF213</i> mutation | 9  | High         |
| 18 | F | 1.35 | 20 | None                                                    | HPAH    | <i>BMPR2</i> mutation  | 11 | High         |
| 19 | F | 1.48 | 40 | Bosentan 125 mg                                         | CHD-PAH | Not tested             | 5  | Low          |
| 20 | M | 1.40 | 23 | None                                                    | IPAH    | No mutations           | 7  | Intermediate |
| 21 | F | 1.71 | 36 | None                                                    | HPAH    | <i>ACVRL1</i> mutation | 11 | High         |

|    |   |      |    |      | <i>BMPR2</i> mutation |              |    |      |
|----|---|------|----|------|-----------------------|--------------|----|------|
| 22 | F | 1.53 | 23 | None | CHD-PAH               | No mutations | 6  | Low  |
| 23 | F | 1.36 | 44 | None | IPAH                  | No mutations | 3  | Low  |
| 24 | F | 1.61 | 28 | None | IPAH                  | No mutations | 9  | High |
| 25 | F | 1.43 | 18 | None | CTD-PAH               | Not tested   | 10 | High |
| 26 | F | 1.36 | 23 | None | IPAH                  | No mutations | 5  | Low  |

\*Risk group was defined by three-category REVEAL 2.0 risk score.<sup>1</sup> The high-risk group was defined as patients with a predicted 1-year survival rate of <90% (REVEAL 2.0 risk score  $\geq 9$ ), the intermediate-risk group was defined as patients with a predicted 1-year survival rate of 90% to <95% (REVEAL 2.0 risk score =7 or 8), and the low-risk group was defined as patients with a predicted 1-year survival rate of  $\geq 95\%$  (REVEAL 2.0 risk score  $\leq 6$ ).

*ACVRL1*, activin A receptor-like kinase 1; *BMPR2*, bone morphogenetic protein receptor type 2; BSA, body surface area; CHD, congenital heart disease; CTD, connective tissue disease; F, female; HPAH, heritable pulmonary arterial hypertension; IPAH, idiopathic pulmonary arterial hypertension; M, male; PAH, pulmonary arterial hypertension; *RNF213*, ring finger protein 213.

1 **Supplemental Table 2. Maximum tolerated dose of each drug**

| Drugs      | Maximum tolerated dose (per day) | Patients, n (%) |
|------------|----------------------------------|-----------------|
| Macitentan | 10.0 mg                          | 25 (96.2)       |
| Riociguat  | 3.0 mg                           | 2 (7.7)         |
|            | 7.5 mg                           | 24 (92.3)       |
| Selexipag  | 0.4 mg                           | 2 (7.7)         |
|            | 0.8 mg                           | 1 (3.8)         |
|            | 1.6 mg                           | 2 (7.7)         |
|            | 2.0 mg                           | 1 (3.8)         |
|            | 3.2 mg                           | 20 (76.9)       |

- 2 In one patient, macitentan could not be tolerated because 10 mg of macitentan caused  
3 suspected myelosuppression.

1 **Supplemental Table 3. Clinical parameters in low/intermediate risk and high risk at**  
 2 **baseline and follow-up**

| Variable                 | Low-/Intermediate-risk group (n=9) |                  | High-risk group (n=9) |                  |
|--------------------------|------------------------------------|------------------|-----------------------|------------------|
|                          | Baseline                           | Follow-up        | Baseline              | Follow-up        |
| Mean RAP, mmHg           | 5.0 (4.0–7.0)                      | 4.0 (3.0–4.0)    | 7.5 (6.5–13.3)        | 5.0 (4.0–6.0)    |
| Mean PAP, mmHg           | 52.0 (44.0–66.0)                   | 35.0 (28.0–40.0) | 63.0 (49.5–64.5)      | 41.0 (40.0–49.0) |
| PAWP, mmHg               | 7.0 (6.0–8.0)                      | 9.0 (8.0–11.0)   | 8.0 (5.5–9.3)         | 9.0 (8.0–11.0)   |
| CO, L/min                | 4.5 (2.9–5.2)                      | 6.4 (5.8–7.5)    | 2.3 (2.1–3.5)         | 5.1 (4.7–6.0)    |
| CI, L/min/m <sup>2</sup> | 2.7 (2.1–3.6)                      | 4.3 (3.4–4.7)    | 1.7 (1.3–2.1)         | 3.6 (3.1–4.2)    |
| PVR, WU                  | 11.3 (7.8–13.4)                    | 3.9 (2.5–4.8)    | 20.2 (14.5–25.5)      | 6.8 (3.8–8.8)    |

3 Data are expressed as median (interquartile range). CI, cardiac index; CO, cardiac output;  
 4 PAP, pulmonary arterial pressure; PAWP, pulmonary arterial wedge pressure; PVR,  
 5 pulmonary vascular resistance; RAP, right atrial pressure; WU, Wood units.

6  
 7  
 8 **Supplemental Reference**

- 9 1. Benza RL, Gomberg-Maitland M, Elliott CG, et al. Predicting survival in patients with  
 10 pulmonary arterial hypertension: The REVEAL risk score calculator 2.0 and comparison  
 11 with ESC/ERS-based risk assessment strategies. *Chest*. 2019; 156: 323-337.
